# Supplementary material
Source: PubMed Central journal article supplement (PMC6657283)
Supplement: djy120_supp.pdf [file djy120_supp.pdf]

## SUPPLEMENTARY MATERIALS

### Supplementary Methods:

A classification system for the risk burden of treatment modalities

### Supplementary Tables:

**Supplementary Table 1.** A list of grouped chronic health conditions evaluated by medical assessment

**Supplementary Table 2.** Demographic, socioeconomic, and clinical determinants of financial hardship by the number of hardship domains

**Supplementary Table 3.** Associations of financial hardship with health and life insurance affordability and retirement planning by the number of hardship domains

**Supplementary Table 4.** Associations of financial hardship with symptom prevalence by the number of hardship domains

**Supplementary Table 5.** Associations of financial hardship with SF-36 physical and mental component summary scores by the number of hardship domains

### Supplementary Figure:

Associations of treatment modalities with cumulative prevalence of symptoms

## **Supplementary Methods**

### A classification system for the risk burden of treatment modalities

To summarize the burden of treatment modalities, each participant was assigned to either low, moderate, or high risk burden group. The application of this classification system was evident in distinguishable associations of three risk burden treatment groups with cumulative prevalence of various symptoms. Participants who have received chemotherapy, radiotherapy and invasive surgery, or radiotherapy and invasive surgery were categorized as a high risk burden group; those who received chemotherapy and radiotherapy, chemotherapy and invasive surgery, radiotherapy only, or invasive surgery only were categorized as a moderate risk burden group; and those who received chemotherapy only were categorized as a low risk burden group. Associations of treatment modalities with cumulative prevalence of symptoms were demonstrated in **Supplementary Figure 1**.

**Supplementary Table 1.** A list of grouped chronic health conditions evaluated by medical assessment

| <b>Grouped conditions</b>      | <b>CTCAE graded conditions</b>         |
|--------------------------------|----------------------------------------|
| Myocardial infarction          | Acute myocardial infarction            |
| Cardiac disorder               | Atrioventricular Heart Block           |
|                                | Conduction abnormalities               |
|                                | Prolonged QT interval                  |
|                                | Cardiac dysrhythmia                    |
|                                | Sinus bradycardia                      |
|                                | Sinus tachycardia                      |
|                                | Cardiomyopathy                         |
|                                | Right ventricular systolic dysfunction |
|                                | Cor pulmonale                          |
|                                | Pulmonary hypertension                 |
|                                | Heart valve disorder                   |
|                                | Pericarditis                           |
|                                | Aortic root aneurysm                   |
|                                | Atrial myxoma                          |
| Peripheral neuropathy          | Peripheral sensory neuropathy          |
|                                | Peripheral motor neuropathy            |
| Stroke                         | Intracranial hemorrhage                |
|                                | Cerebrovascular accident               |
|                                | Cerebrovascular disease                |
| Upper gastrointestinal disease | Dysphagia                              |
|                                | Esophageal stricture                   |
|                                | Esophageal varices                     |
| Respiratory disorder           | Asthma                                 |
|                                | Chronic obstructive pulmonary disease  |
|                                | Obstructive sleep apnea                |
|                                | Obstructive pulmonary deficit          |
|                                | Restrictive pulmonary deficits         |
|                                | Pulmonary diffusion deficits           |
| Diabetes                       | Abnormal Glucose Metabolism            |
| Chronic kidney disease         | Chronic kidney disease                 |
| Hepatic disorder               | Fibrosis/Cirrhosis                     |
|                                | Portal hypertension                    |
|                                | Hepatic failure                        |
|                                | Hepatopathy                            |
|                                | Steatohepatitis                        |
|                                | Veno-occlusive disease of liver        |
| Seizures                       | Seizures                               |

|                       |                                   |
|-----------------------|-----------------------------------|
| Reproductive disorder | Genitourinary adhesions           |
|                       | Cervical dysplasia                |
|                       | Endometriosis                     |
|                       | Dysfunctional uterine bleeding    |
|                       | Dyspareunia                       |
|                       | Polycystic ovarian syndrome       |
|                       | Vaginal fistula                   |
|                       | Vaginal stenosis                  |
|                       | Erectile dysfunction              |
|                       | Retrograde ejaculation            |
|                       | Prostatic hypertrophy, benign     |
|                       | Abnormal sperm concentration      |
|                       | Central hypogonadism              |
|                       | Primary hypogonadism              |
| Subsequent neoplasm   | SMN                               |
| Skeletal disorder     | Osteonecrosis                     |
|                       | Temporomandibular joint disorder  |
|                       | Slipped capital femoral epiphysis |
|                       | Intervertebral disc disorder      |
|                       | Kyphosis                          |
|                       | Scoliosis                         |
|                       | Skeletal spine disorder           |
| Hearing loss          | Hearing Loss                      |
| Amputation            | Amputation                        |

**Supplementary Table 2.** Demographic, socioeconomic, and clinical determinants of financial hardship by the number of hardship domains

| Determinants of financial hardship      | One domain*          |        | Two domains*          |        | Three domains*         |        |
|-----------------------------------------|----------------------|--------|-----------------------|--------|------------------------|--------|
|                                         | RR<br>[95% CI]       | P†     | RR<br>[95% CI]        | P†     | RR<br>[95% CI]         | P†     |
| Age at evaluation                       |                      |        |                       |        |                        |        |
| 18 – 29.9 years                         | Reference            |        | Reference             |        | Reference              |        |
| 30 – 39.9 years                         | 1.51<br>[1.11, 2.04] | 0.008  | 2.07<br>[1.46, 2.91]  | <0.001 | 2.59<br>[1.57, 4.26]   | <0.001 |
| ≥ 40 years                              | 2.04<br>[1.32, 3.17] | 0.001  | 2.98<br>[1.78, 4.98]  | <0.001 | 3.59<br>[1.79, 7.19]   | <0.001 |
| Time since diagnosis                    |                      |        |                       |        |                        |        |
| 10 – 19 years                           | 0.82<br>[0.55, 1.22] | 0.33   | 1.68<br>[1.05, 2.67]  | 0.03   | 1.45<br>[0.77, 2.73]   | 0.25   |
| 20 – 29 years                           | 0.88<br>[0.64, 1.23] | 0.46   | 1.49<br>[1.01, 2.20]  | 0.04   | 1.29<br>[0.78, 2.13]   | 0.32   |
| ≥ 30 years                              | Reference            |        | Reference             |        | Reference              |        |
| Sex                                     |                      |        |                       |        |                        |        |
| Male                                    | 0.85<br>[0.68, 1.07] | 0.16   | 0.71<br>[0.54, 0.92]  | 0.01   | 1.17<br>[0.80, 1.71]   | 0.41   |
| Female                                  | Reference            |        | Reference             |        | Reference              |        |
| Race/ethnicity                          |                      |        |                       |        |                        |        |
| White, non-Hispanic                     | Reference            |        | Reference             |        | Reference              |        |
| Black, non-Hispanic                     | 1.22<br>[0.82, 1.81] | 0.32   | 0.93<br>[0.60, 1.44]  | 0.75   | 1.24<br>[0.71, 2.14]   | 0.45   |
| Hispanic                                | 1.50<br>[0.86, 2.63] | 0.16   | 1.08<br>[0.54, 2.17]  | 0.84   | 0.65<br>[0.18, 2.37]   | 0.52   |
| Other‡                                  | 1.25<br>[0.78, 2.00] | 0.35   | 1.20<br>[0.69, 2.11]  | 0.52   | 0.75<br>[0.29, 1.94]   | 0.56   |
| Educational attainment                  |                      |        |                       |        |                        |        |
| Below high school                       | 2.52<br>[1.43, 4.43] | 0.001  | 4.27<br>[2.36, 7.72]  | <0.001 | 3.70<br>[1.78, 7.72]   | <0.001 |
| High school graduate/GED                | 2.27<br>[1.60, 3.22] | <0.001 | 2.76<br>[1.85, 4.11]  | <0.001 | 2.39<br>[1.38, 4.13]   | 0.002  |
| Some college/training after high school | 1.46<br>[1.12, 1.90] | 0.005  | 1.97<br>[1.43, 2.70]  | <0.001 | 1.63<br>[1.02, 2.60]   | 0.04   |
| College graduate or above               | Reference            |        | Reference             |        | Reference              |        |
| Employment status                       |                      |        |                       |        |                        |        |
| Currently employed                      | Reference            |        | Reference             |        | Reference              |        |
| Currently unemployed                    | 1.65<br>[1.13, 2.41] | 0.009  | 1.79<br>[1.20, 2.67]  | 0.005  | 2.15<br>[1.30, 3.55]   | 0.003  |
| Annual household income                 |                      |        |                       |        |                        |        |
| ≤ \$39,999                              | 2.31<br>[1.68, 3.19] | <0.001 | 7.96<br>[5.26, 12.06] | <0.001 | 14.64<br>[7.24, 29.59] | <0.001 |
| \$40,000 – \$79,999                     | 1.68<br>[1.27, 2.23] | <0.001 | 2.67<br>[1.78, 4.00]  | <0.001 | 2.64<br>[1.27, 5.50]   | 0.009  |

|                                                                          |                      |       |                      |        |                      |        |
|--------------------------------------------------------------------------|----------------------|-------|----------------------|--------|----------------------|--------|
| ≥ \$80,000                                                               | Reference            |       | Reference            |        | Reference            |        |
| Number of people supported by household income                           | 0.99<br>[0.90, 1.08] | 0.79  | 1.12<br>[1.01, 1.24] | 0.03   | 1.11<br>[0.97, 1.27] | 0.14   |
| Marital status                                                           |                      |       |                      |        |                      |        |
| Married                                                                  | Reference            |       | Reference            |        | Reference            |        |
| Status other than married                                                | 1.45<br>[1.12, 1.87] | 0.004 | 1.78<br>[1.32, 2.40] | <0.001 | 1.61<br>[1.05, 2.47] | 0.03   |
| Burden of treatment modalities§                                          |                      |       |                      |        |                      |        |
| Low risk burden                                                          | Reference            |       | Reference            |        | Reference            |        |
| Moderate risk burden                                                     | 1.62<br>[1.15, 2.29] | 0.006 | 1.19<br>[0.80, 1.77] | 0.39   | 3.70<br>[1.67, 8.21] | 0.001  |
| High risk burden                                                         | 1.49<br>[1.04, 2.14] | 0.03  | 1.44<br>[0.95, 2.16] | 0.08   | 3.48<br>[1.55, 7.82] | 0.003  |
| Chronic health conditions (CTCAE grades 2-4 vs. grade 1 or no condition) |                      |       |                      |        |                      |        |
| Myocardial infarction                                                    | 2.08<br>[1.07, 4.06] | 0.03  | 2.15<br>[1.01, 4.57] | 0.05   | 3.30<br>[1.40, 7.75] | 0.006  |
| Cardiac disorder                                                         | 1.08<br>[0.71, 1.64] | 0.72  | 1.56<br>[1.00, 2.44] | 0.05   | 1.32<br>[0.72, 2.39] | 0.37   |
| Peripheral neuropathy                                                    | 1.17<br>[0.68, 2.02] | 0.58  | 1.95<br>[1.12, 3.37] | 0.02   | 2.15<br>[1.11, 4.14] | 0.02   |
| Stroke                                                                   | 1.42<br>[0.67, 3.00] | 0.36  | 1.26<br>[0.53, 3.02] | 0.60   | 1.40<br>[0.44, 4.44] | 0.56   |
| Upper gastrointestinal disease                                           | 1.39<br>[0.74, 2.62] | 0.31  | 1.63<br>[0.81, 3.29] | 0.17   | 1.99<br>[0.86, 4.60] | 0.11   |
| Respiratory disorder                                                     | 1.09<br>[0.79, 1.52] | 0.60  | 1.12<br>[0.78, 1.62] | 0.54   | 1.36<br>[0.83, 2.21] | 0.22   |
| Diabetes                                                                 | 1.14<br>[0.72, 1.80] | 0.59  | 1.21<br>[0.72, 2.04] | 0.48   | 1.36<br>[0.69, 2.71] | 0.37   |
| Chronic kidney disease                                                   | 0.92<br>[0.40, 2.12] | 0.85  | 1.51<br>[0.63, 3.62] | 0.36   | 0.52<br>[0.10, 2.57] | 0.42   |
| Hepatic disorder                                                         | 1.87<br>[0.95, 3.67] | 0.07  | 1.90<br>[0.90, 4.03] | 0.09   | 1.77<br>[0.70, 4.51] | 0.23   |
| Seizures                                                                 | 1.57<br>[0.99, 2.47] | 0.05  | 1.34<br>[0.79, 2.27] | 0.28   | 1.05<br>[0.50, 2.21] | 0.90   |
| Reproductive disorder                                                    | 1.23<br>[0.96, 1.57] | 0.10  | 1.47<br>[1.11, 1.95] | 0.007  | 2.19<br>[1.49, 3.22] | <0.001 |
| Subsequent neoplasm                                                      | 1.60<br>[1.01, 2.54] | 0.04  | 1.31<br>[0.75, 2.28] | 0.35   | 2.33<br>[1.19, 4.59] | 0.01   |
| Skeletal disorder                                                        | 1.19<br>[0.81, 1.74] | 0.40  | 0.99<br>[0.62, 1.56] | 0.95   | 1.79<br>[0.99, 3.22] | 0.05   |
| Hearing loss                                                             | 1.12<br>[0.74, 1.71] | 0.58  | 1.06<br>[0.66, 1.71] | 0.81   | 0.63<br>[0.31, 1.26] | 0.19   |
| Amputation                                                               | 0.63<br>[0.30, 1.32] | 0.23  | 1.00<br>[0.45, 2.23] | 0.99   | 1.14<br>[0.39, 3.30] | 0.82   |

\* Reference group: no hardship on any domains; GED = General Equivalency Diploma

† P values were computed based on multinomial logistic regression model (two-sided).  
‡ Other: American Indian, Alaska Native, Asian, and Pacific Islander.  
§ High risk burden: chemotherapy, radiotherapy and invasive surgery, or radiotherapy plus invasive surgery. Moderate risk burden: chemotherapy plus radiotherapy, chemotherapy plus invasive surgery, radiotherapy only, or invasive surgery only. Low risk burden: chemotherapy only (see Supplementary Methods)

**Supplementary Table 3.** Associations of financial hardship with health and life insurance affordability and retirement planning by the number of hardship domains

| Number of hardship domains     | Difficulty in acquiring health insurance |        | Difficulty in acquiring life insurance |        | Impact on retirement planning |        |
|--------------------------------|------------------------------------------|--------|----------------------------------------|--------|-------------------------------|--------|
|                                | OR [95% CI]                              | P*     | OR [95% CI]                            | P*     | OR [95% CI]                   | P*     |
| <b>Bivariate analysis</b>      |                                          |        |                                        |        |                               |        |
| One domain†                    | 2.00<br>[1.56, 2.57]                     | <0.001 | 1.72<br>[1.31, 2.26]                   | <0.001 | 6.54<br>[4.02, 10.63]         | <0.001 |
| Two domains†                   | 4.64<br>[3.61, 5.97]                     | <0.001 | 2.91<br>[2.18, 3.89]                   | <0.001 | 13.26<br>[8.19, 21.48]        | <0.001 |
| Three domains†                 | 5.59<br>[4.06, 7.70]                     | <0.001 | 4.09<br>[2.77, 6.02]                   | <0.001 | 51.36<br>[30.83, 85.57]       | <0.001 |
| <b>Multivariable analysis‡</b> |                                          |        |                                        |        |                               |        |
|                                | OR [95% CI]                              | P      | OR [95% CI]                            | P      | OR [95% CI]                   | P      |
| One domain                     | 2.09<br>[1.55, 2.83]                     | <0.001 | 1.72<br>[1.26, 2.36]                   | 0.001  | 5.71<br>[3.13, 10.40]         | <0.001 |
| Two domains                    | 4.87<br>[3.52, 6.75]                     | <0.001 | 2.62<br>[1.82, 3.78]                   | <0.001 | 13.92<br>[7.55, 25.65]        | <0.001 |
| Three domains                  | 7.28<br>[4.78, 11.08]                    | <0.001 | 4.70<br>[2.86, 7.72]                   | <0.001 | 53.97<br>[27.91, 104.38]      | <0.001 |

\* P values were computed based on logistic regression models (two-sided).

† Reference group: no hardship on any domains

‡ Analysis adjusted for age at evaluation, time since diagnosis, sex, race/ethnicity, educational attainment, employment status, annual household income, the number of people supported by household income, marital status, burden of treatment modalities, and 15 groups of chronic health conditions



**Supplementary Table 4.** Associations of financial hardship with symptom prevalence by the number of hardship domains

| Number of hardship domains     | Physical symptoms     |                   |                    |                     | Emotional symptoms   |                     |                      |                     |
|--------------------------------|-----------------------|-------------------|--------------------|---------------------|----------------------|---------------------|----------------------|---------------------|
|                                | Sensation abnormality | Cardiac symptom   | Pulmonary symptom  | Pain                | Somatization         | Anxiety             | Depression           | Suicidal ideation   |
| <b>Bivariate analysis</b>      |                       |                   |                    |                     |                      |                     |                      |                     |
|                                | OR [95% CI]           | OR [95% CI]       | OR [95% CI]        | OR [95% CI]         | OR [95% CI]          | OR [95% CI]         | OR [95% CI]          | OR [95% CI]         |
| One domain*                    | 1.87 [1.51, 2.32]     | 1.51 [1.11, 2.04] | 1.43 [0.84, 2.45]  | 1.96 [1.60, 2.41]   | 3.52 [2.45, 5.06]    | 2.75 [1.84, 4.13]   | 3.42 [2.32, 5.05]    | 3.29 [1.97, 5.52]   |
| Two domains*                   | 3.55 [2.83, 4.46]     | 3.19 [2.37, 4.28] | 4.72 [2.93, 7.60]  | 4.01 [3.06, 5.26]   | 10.22 [7.19, 14.54]  | 6.81 [4.61, 10.05]  | 9.14 [6.26, 13.33]   | 6.68 [4.04, 11.04]  |
| Three domains*                 | 5.23 [3.87, 7.07]     | 3.99 [2.78, 5.75] | 5.83 [3.36, 10.10] | 10.14 [5.71, 18.01] | 20.69 [13.88, 30.85] | 13.23 [8.61, 20.34] | 15.93 [10.45, 24.30] | 10.77 [6.23, 18.61] |
| <b>Multivariable analysis†</b> |                       |                   |                    |                     |                      |                     |                      |                     |
|                                | OR [95% CI]           | OR [95% CI]       | OR [95% CI]        | OR [95% CI]         | OR [95% CI]          | OR [95% CI]         | OR [95% CI]          | OR [95% CI]         |
| One domain                     | 1.69 [1.29, 2.21]     | 1.28 [0.88, 1.88] | 1.42 [0.74, 2.73]  | 1.93 [1.49, 2.49]   | 3.20 [2.05, 4.99]    | 1.84 [1.15, 2.95]   | 2.12 [1.35, 3.31]    | 2.65 [1.43, 4.92]   |
| Two domains                    | 3.13 [2.33, 4.20]     | 2.54 [1.71, 3.77] | 3.37 [1.78, 6.36]  | 3.13 [2.22, 4.40]   | 7.71 [4.93, 12.05]   | 3.89 [2.42, 6.24]   | 5.32 [3.41, 8.30]    | 5.55 [3.00, 10.26]  |
| Three domains                  | 4.50 [3.03, 6.69]     | 3.14 [1.91, 5.16] | 3.48 [1.65, 7.30]  | 5.65 [2.99, 10.66]  | 13.76 [8.20, 23.09]  | 7.02 [4.09, 12.05]  | 7.67 [4.58, 12.84]   | 5.99 [2.97, 12.10]  |

\* Reference group: no hardship on any domains

† Analysis adjusted for age at evaluation, time since diagnosis, sex, race/ethnicity, educational attainment, employment status, annual household income, the number of people supported by household income, marital status, burden of treatment modalities, and 15 groups of chronic health conditions

**Supplementary Table 5.** Associations of financial hardship with SF-36 physical and mental component summary scores by the number of hardship domains

|                                | Physical component summary |        | Mental component summary   |        |
|--------------------------------|----------------------------|--------|----------------------------|--------|
| Number of hardship domains     | Raw scores [SD]            |        | Raw scores [SD]            |        |
| None                           | 55.14 [5.65]               |        | 53.86 [6.45]               |        |
| One domain                     | 50.96 [8.13]               |        | 49.67 [8.47]               |        |
| Two domains                    | 45.93 [9.81]               |        | 44.76 [9.74]               |        |
| Three domains                  | 39.92 [10.31]              |        | 38.87 [10.42]              |        |
| <b>Bivariate analysis</b>      |                            |        |                            |        |
|                                | Beta [95% CI]              | P*     | Beta [95% CI]              | P*     |
| One domain†                    | -4.18<br>[-4.92, -3.44]    | <0.001 | -4.19<br>[-4.96, -3.42]    | <0.001 |
| Two domains†                   | -9.21<br>[-10.02, -8.39]   | <0.001 | -9.11<br>[-9.95, -8.26]    | <0.001 |
| Three domains†                 | -15.23<br>[-16.36, -14.09] | <0.001 | -14.99<br>[-16.17, -13.81] | <0.001 |
| <b>Multivariable analysis‡</b> |                            |        |                            |        |
|                                | Beta [95% CI]              | P      | Beta [95% CI]              | P      |
| One domain                     | -2.98<br>[-3.75, -2.21]    | <0.001 | -3.47<br>[-4.33, -2.60]    | <0.001 |
| Two domains                    | -6.53<br>[-7.43, -5.64]    | <0.001 | -7.27<br>[-8.28, -6.27]    | <0.001 |
| Three domains                  | -11.41<br>[-12.67, -10.16] | <0.001 | -12.47<br>[-13.88, -11.05] | <0.001 |

\* P values were computed based on multivariable linear regression models (two-sided).

† Reference group: no hardship on any domains

‡ Analysis adjusted for age at evaluation, time since diagnosis, sex, race/ethnicity, educational attainment, employment status, annual household income, the number of people supported by household income, marital status, burden of treatment modalities, and 15 groups of chronic health conditions

**Supplementary Figure 1.** Associations of treatment modalities with cumulative prevalence of symptoms

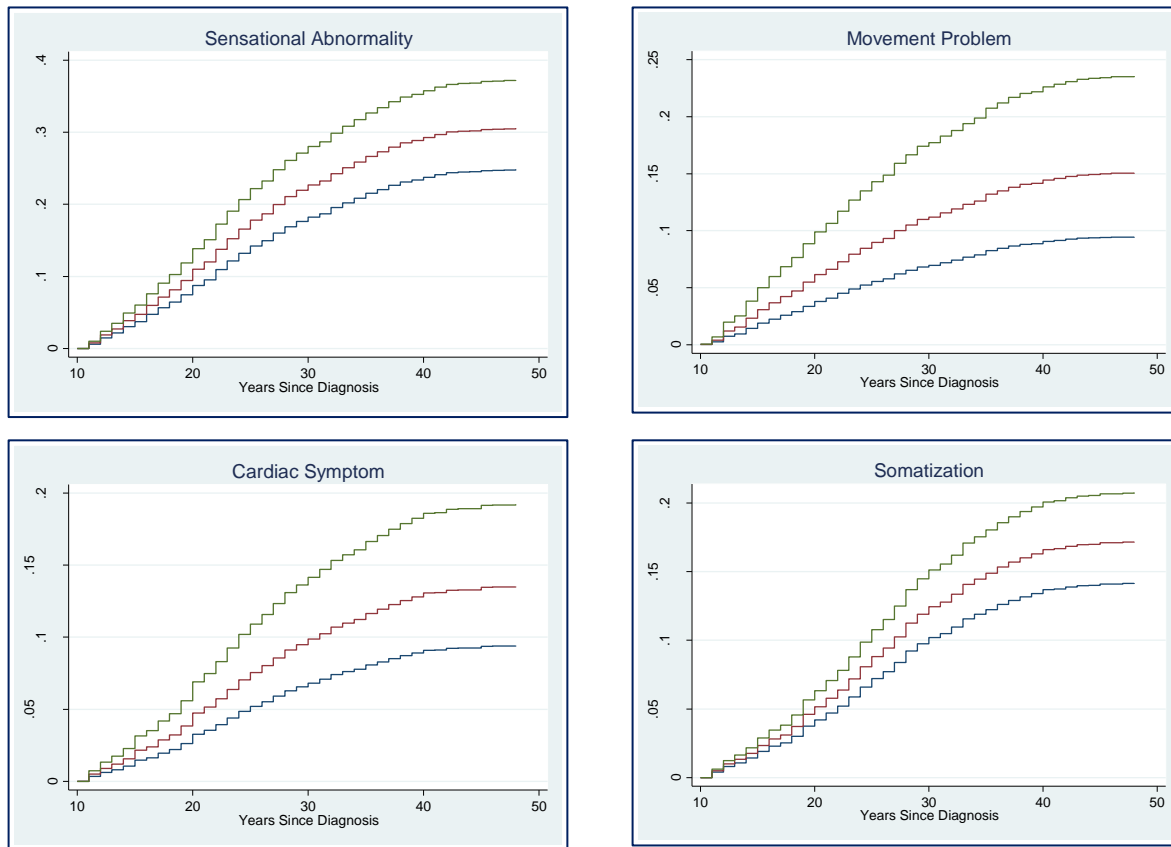

Footnote: blue line: low risk burden group; red line: moderate risk burden group; green line: high risk burden group
